# Supplementary material
Source: HighWire-hosted journal article supplement (http://d2538ggaoe6cji.cloudfront.net/highwire/filestream/204/field_highwire_adjunct_files/0/000653-1.pdf)
Supplement: 000653-1.pdf [file 000653-1.pdf]

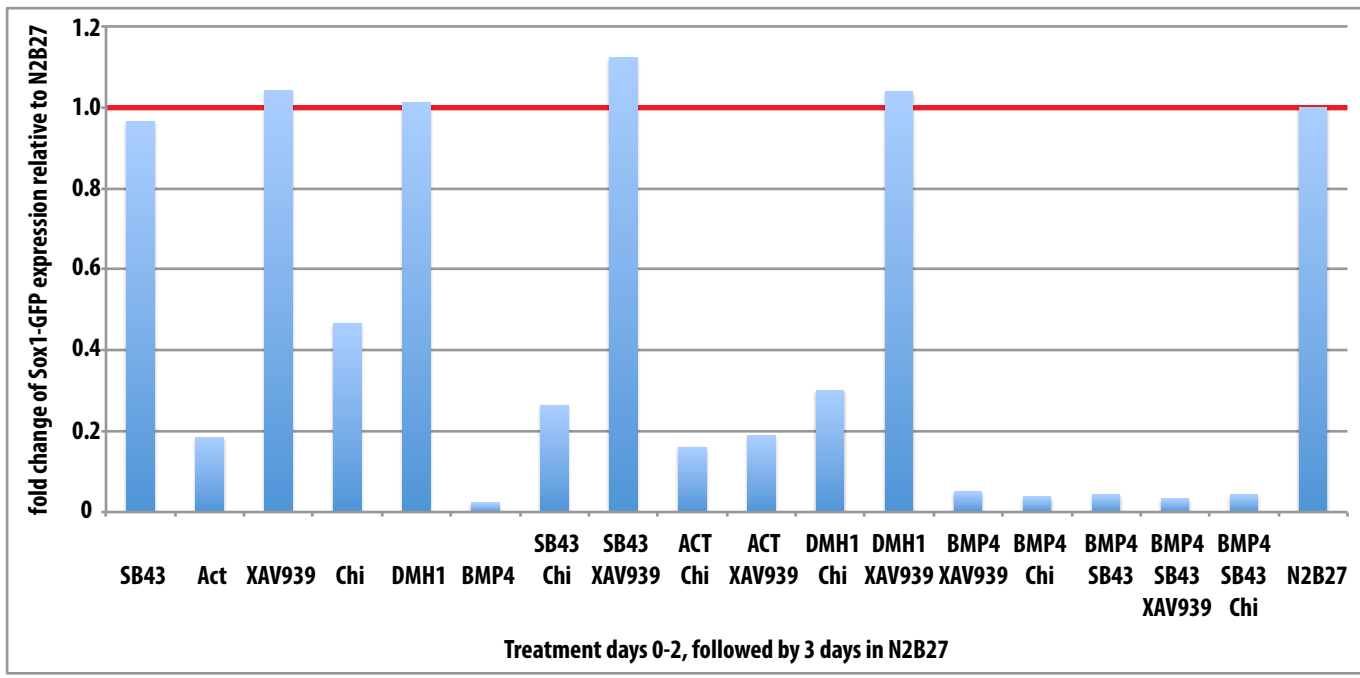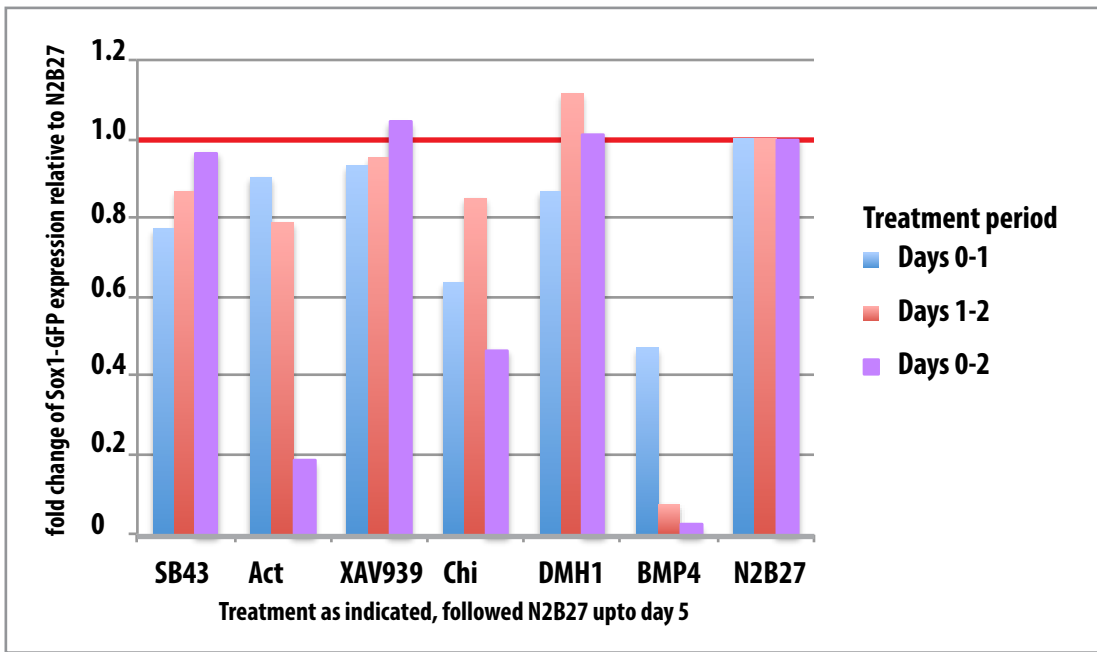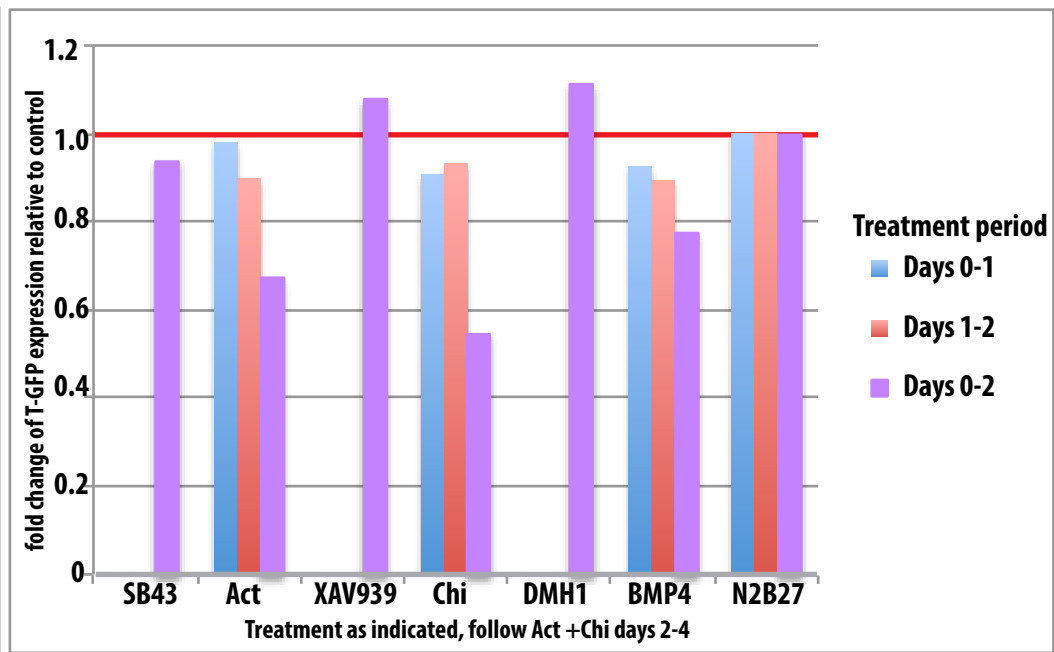

**Supplementary Data for Figure 2**

(A) Sox1::GFP cells were cultured in the indicated factors days 0-2, followed by days 2-5 in N2B27. (B-C) Sox1::GFP (B) or T::GFP(C) cells were maintained in N2B27 for 5 days (Sox1::GFP) or 2 days in N2B27, followed by 2 days in AC (T::GFP) and exposed to pulses of the treatment as indicated. GFP expression was analyzed by flow cytometry and results were normalized to 5 days in N2B27 (Sox1::GFP) or 2 days N2B27 followed by 2days AC (T::GFP). Note the effect of the factors and treatments have remarkably similar effects on GFP expression in both Sox1::GFP cells and T::GFP cells.
